# Supplementary material for: Current treatment of bulk single walled carbon nanotubes to heal defects without structural change for increased electrical and thermal conductivities
Source: Royal Society of Chemistry journal article supplement (doi:10.1039/c5nr00170f), 2015-01-01
Supplement: c5nr00170f1.pdf [file c5nr00170f1.pdf]

Supplemental information (Supplemental Figure)

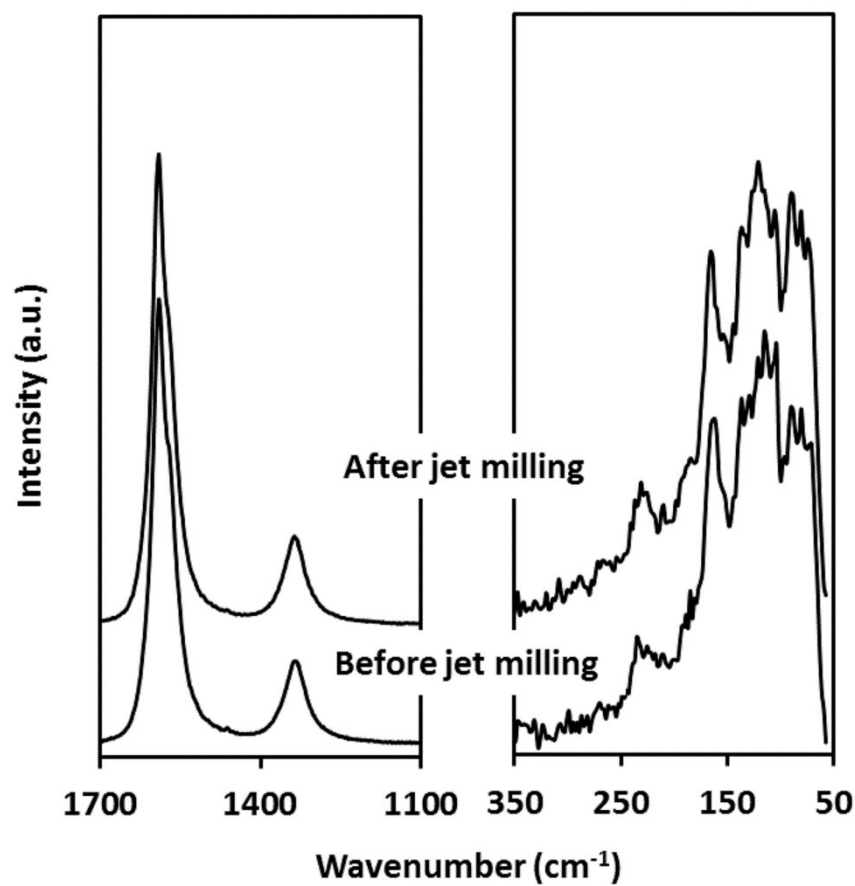

**Fig. S1** Raman spectra measured from the *heat&current* SWCNTs before/after jet milling.
